# Supplementary material for: Alterations in protein expression and site-specific N-glycosylation of prostate cancer tissues
Source: PubMed Central journal article supplement (PMC8342536; doi:10.1038/s41598-021-95417-5), 2021-08-05
Supplement: 41598_2021_95417_MOESM1_ESM.pdf [file 41598_2021_95417_MOESM1_ESM.pdf]

# Supplementary data for

## Alterations in protein expression and site-specific *N*-glycosylation of prostate cancer tissues

### Table of contents:

- 1.: Supplementary Table S1
- 2.: Supplementary Table S8
- 3.: Supplementary Figure S1
- 4.: Supplementary Figure S2
- 5.: Supplementary Figure S3
- 6.: Supplementary Figure S4
- 7.: Supplementary Figure S5
- 8.: Supplementary Figure S6
- 9.: Supplementary Figure S7
- 10.: Supplementary Figure S8

### Supplementary Tables S2-S7 and S9-S10 are provided separately as text files:

Supplementary Table S2: Over- and underexpressed proteins between healthy and cancerous prostate tissues.

Supplementary Table S3: Proteins with significant changes among various prostate cancer grades and healthy tissues (quantitative data is provided as *Z*-scores).

Supplementary Table S4: GOBP terms identified by STRING in proteins underexpressed in prostate cancer.

Supplementary Table S5: KEGG terms identified by STRING in proteins underexpressed in prostate cancer.

Supplementary Table S6: GOBP terms identified by STRING in proteins overexpressed in prostate cancer.

Supplementary Table S7: KEGG terms identified by STRING in proteins overexpressed in prostate cancer.

Supplementary Table S9: Parameters for the softwares used: MASCOT, MaxQuant, Byonic and GlycoPattern.

Supplementary Table S10: Parameters for the different statistical tests used.

**Supplementary Table S1. The terms used to characterize N-glycosylation and their short explanation**

---

| Term            | Explanation                                                                                                 |
|-----------------|-------------------------------------------------------------------------------------------------------------|
| Glycan type     | The proportion of glycans classified as either Complex, Oligomannose, Hybrid or Paucimannose.               |
| Branching       | The proportion of glycans with a set number of antennae versus all of them - for Complex type glycans only. |
| Sialylation     | The proportion of antennae that contain a Sialic acid residue versus all complete antennae.                 |
| Fucosylation    | The proportion of glycans with a Fucose residue versus all Complex, Hybrid and Paucimannose glycans.        |
| Galactosylation | The proportion of complete antennae versus all antennae.                                                    |

**Supplementary Table S8. Summary of multiple classifications from the Human Protein Atlas for the glycoproteins discussed in the paper**

| Protein | Prognostic summary                                                                     | Cancer specificity | Secretome annotation |
|---------|----------------------------------------------------------------------------------------|--------------------|----------------------|
| CO6A2   | Unfavorable in Renal cancer                                                            | Low                | Extracellular matrix |
| POSTN   | Unfavorable in Renal, Lung, Stomach cancer                                             | Breast cancer      | Extracellular matrix |
| THRB    | Unfavorable in Renal cancer                                                            | Low                | Blood                |
| PPAP    | -                                                                                      | Prostate cancer    | Blood                |
| A1AG1   | Unfavorable in Renal cancer                                                            | Liver cancer       | Blood                |
| MFAP4   | Unfavorable in Renal, Ovarian, Urothelial cancer,<br>Favorable in Neck and Head cancer | Low                | Extracellular matrix |
| PGS1    | Unfavorable in Renal cancer                                                            | Low                | Extracellular matrix |

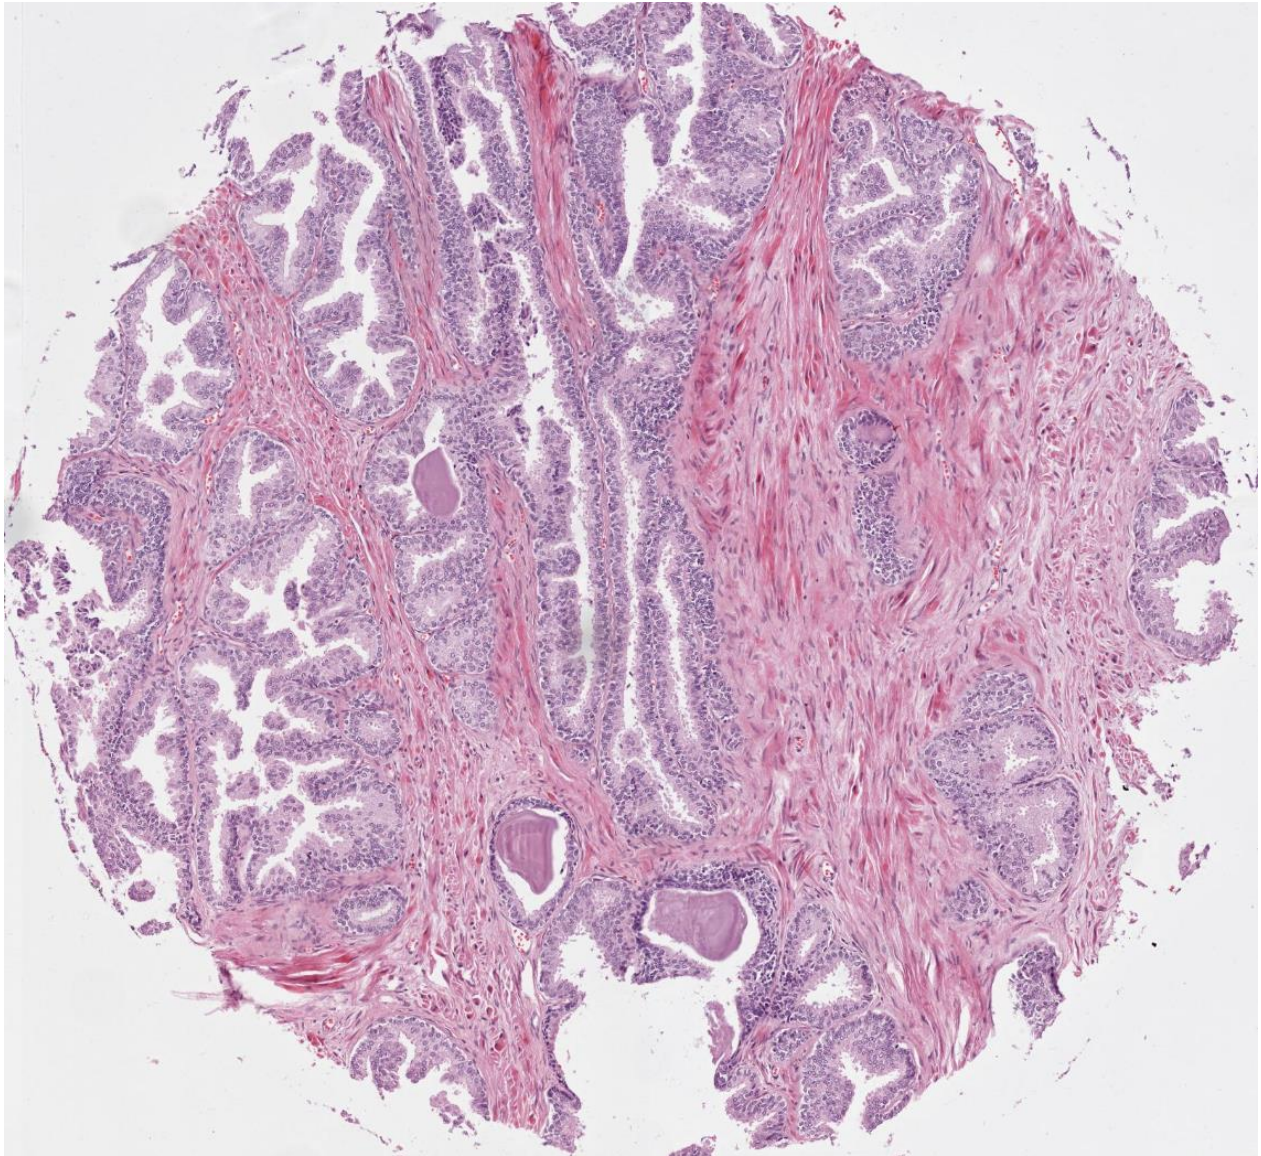

Supplementary Figure S1: An example of a stained healthy prostate TMA sample. Original image from US Biomax webpage (<https://www.biomax.us/tissue-arrays/Prostate/PR633>).

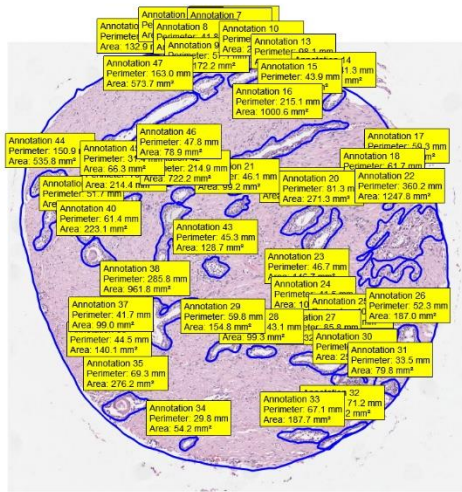

50000 μm

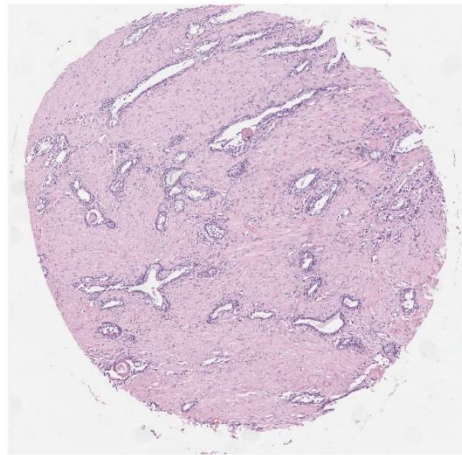

50000 μm

Supplementary Figure S2: An example of a stained Grade 1 TMA sample, in original, and in pathologically annotated form. Original image from US Biomax webpage (<https://www.biomax.us/tissue-arrays/Prostate/PR633>). The manual annotation of cancerous and non-cancerous tissue areas was carried out using CaseViewer software version 2.4.0.119028 (3DHitech Ltd., Budapest, Hungary).

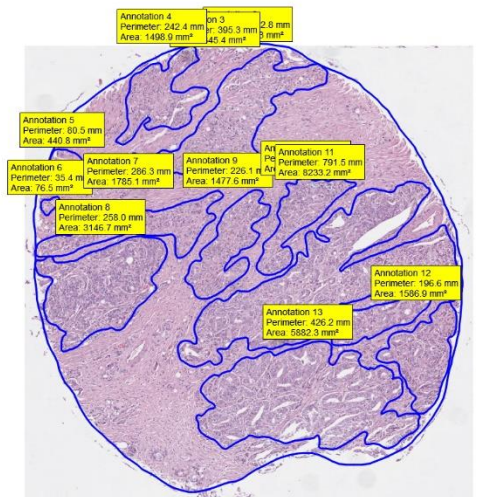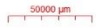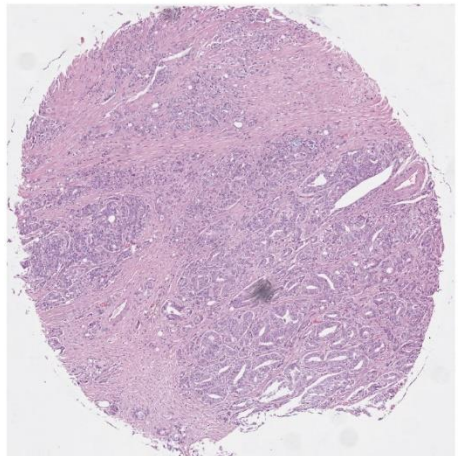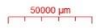

Supplementary Figure S3: An example of a stained Grade 2 TMA sample, in original, and in pathologically annotated form. Original image from US Biomax webpage (<https://www.biomax.us/tissue-arrays/Prostate/PR633>). The manual annotation of cancerous and non-cancerous tissue areas was carried out using CaseViewer software version 2.4.0.119028 (3DHitech Ltd., Budapest, Hungary).

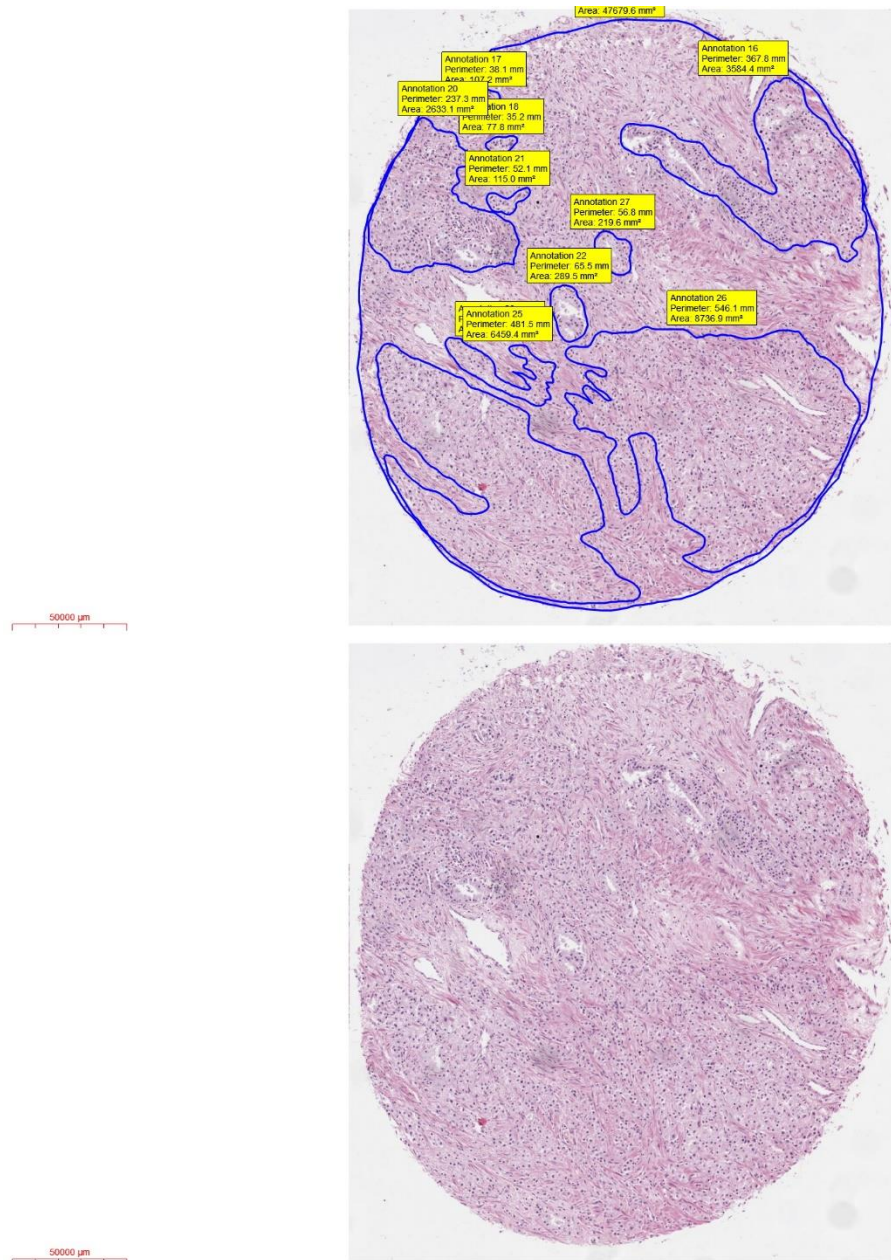

Supplementary Figure S4: An example of a stained Grade 3 TMA sample, in original, and in pathologically annotated form. Original image from US Biomax webpage (<https://www.biomax.us/tissue-arrays/Prostate/PR633>). The manual annotation of cancerous and non-cancerous tissue areas was carried out using CaseViewer software version 2.4.0.119028 (3DHitech Ltd., Budapest, Hungary).

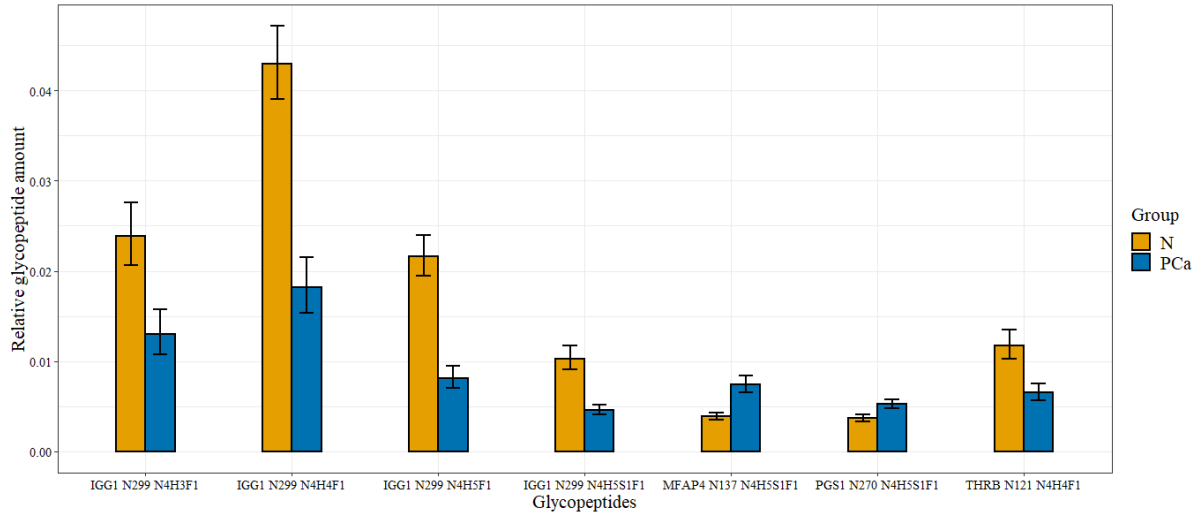

Supplementary Figure S5: Glycopeptides with significantly different abundances between healthy and cancerous tissues with standard error.



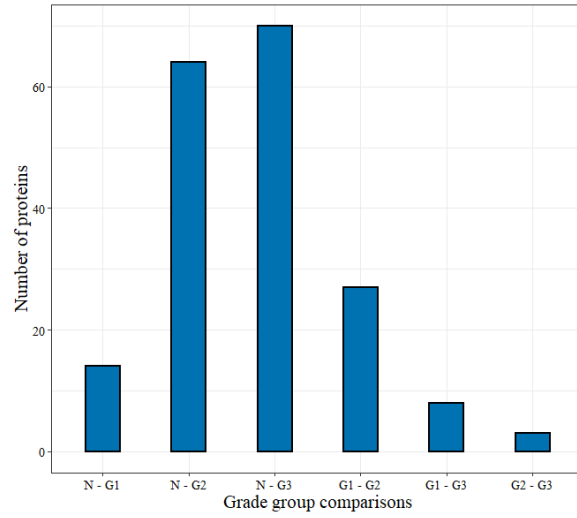

Supplementary Figure S6: The number of proteins with significant differences in the different pairwise comparisons between prostate cancer grades and healthy tissue.

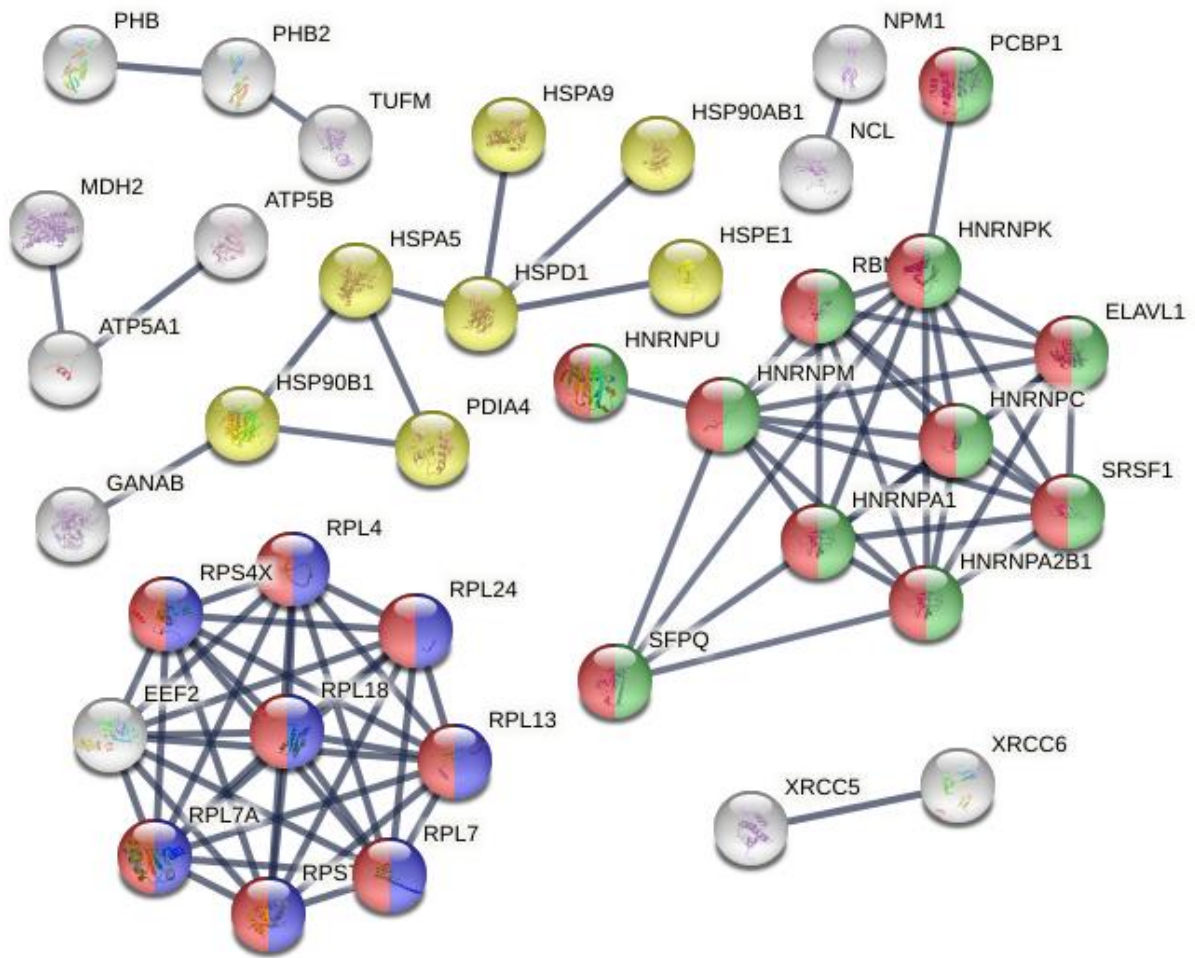

Supplementary Figure S7: PPI Networks constructed in STRING for proteins upregulated in prostate cancer.

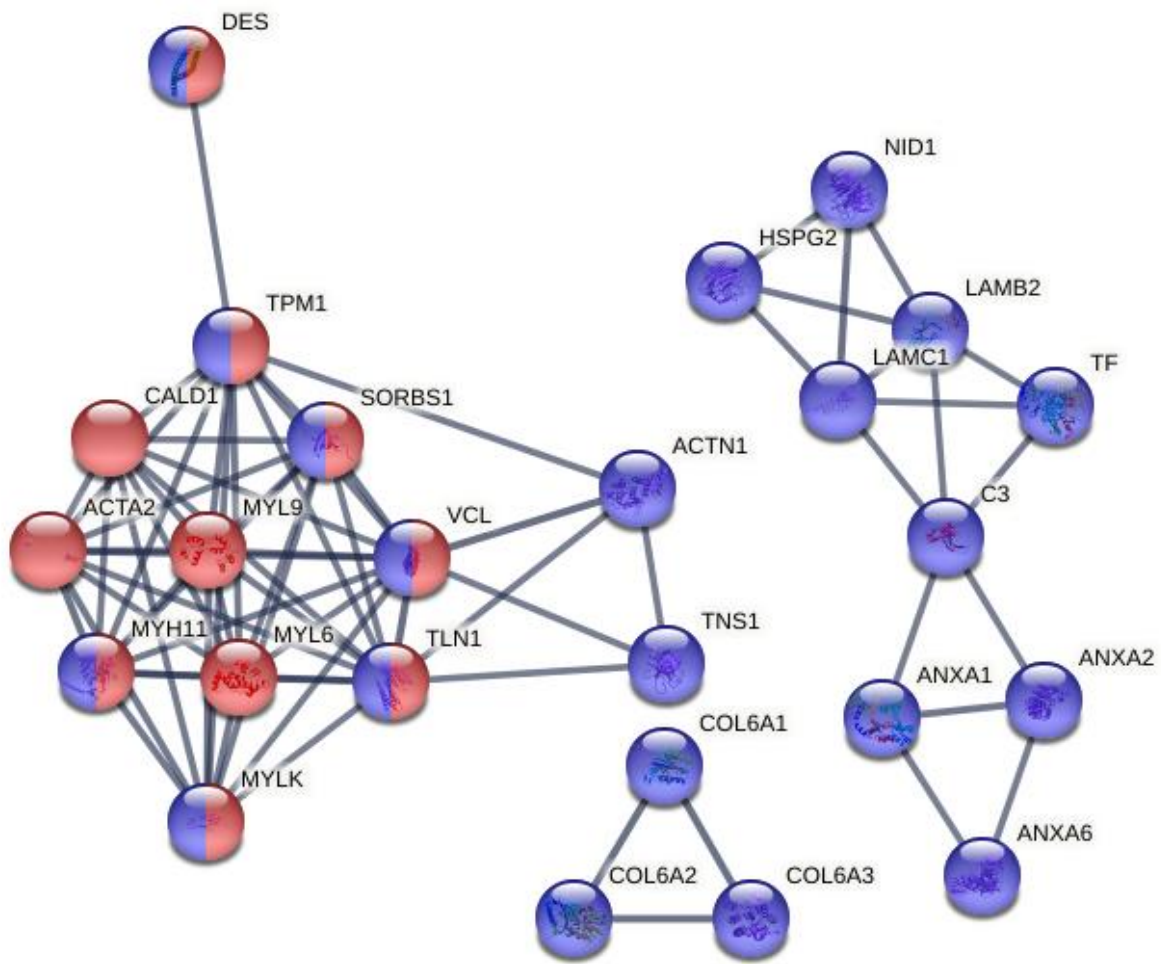

Supplementary Figure S8: PPI Networks constructed in STRING for proteins downregulated in prostate cancer.
